# Supplementary material for: Contrasting the Effects of Task Difficulty and Perceptual Load on Auditory Detection Sensitivity in Individuals with Autism
Source: Springer Nature journal article supplement (doi:10.1007/s10803-018-3766-8), 2018-09-22

- Supplementary Figure 1 created with STATA 15

**Supplementary Fig. 1** Violin plot of Reaction Time (RT) difference scores in the sample. Mirrored density curves highlight the distribution of the data. The red marker indicates the median of the data; the box indicates the interquartile range and the spikes extend to the upper- and lower-adjacent values.


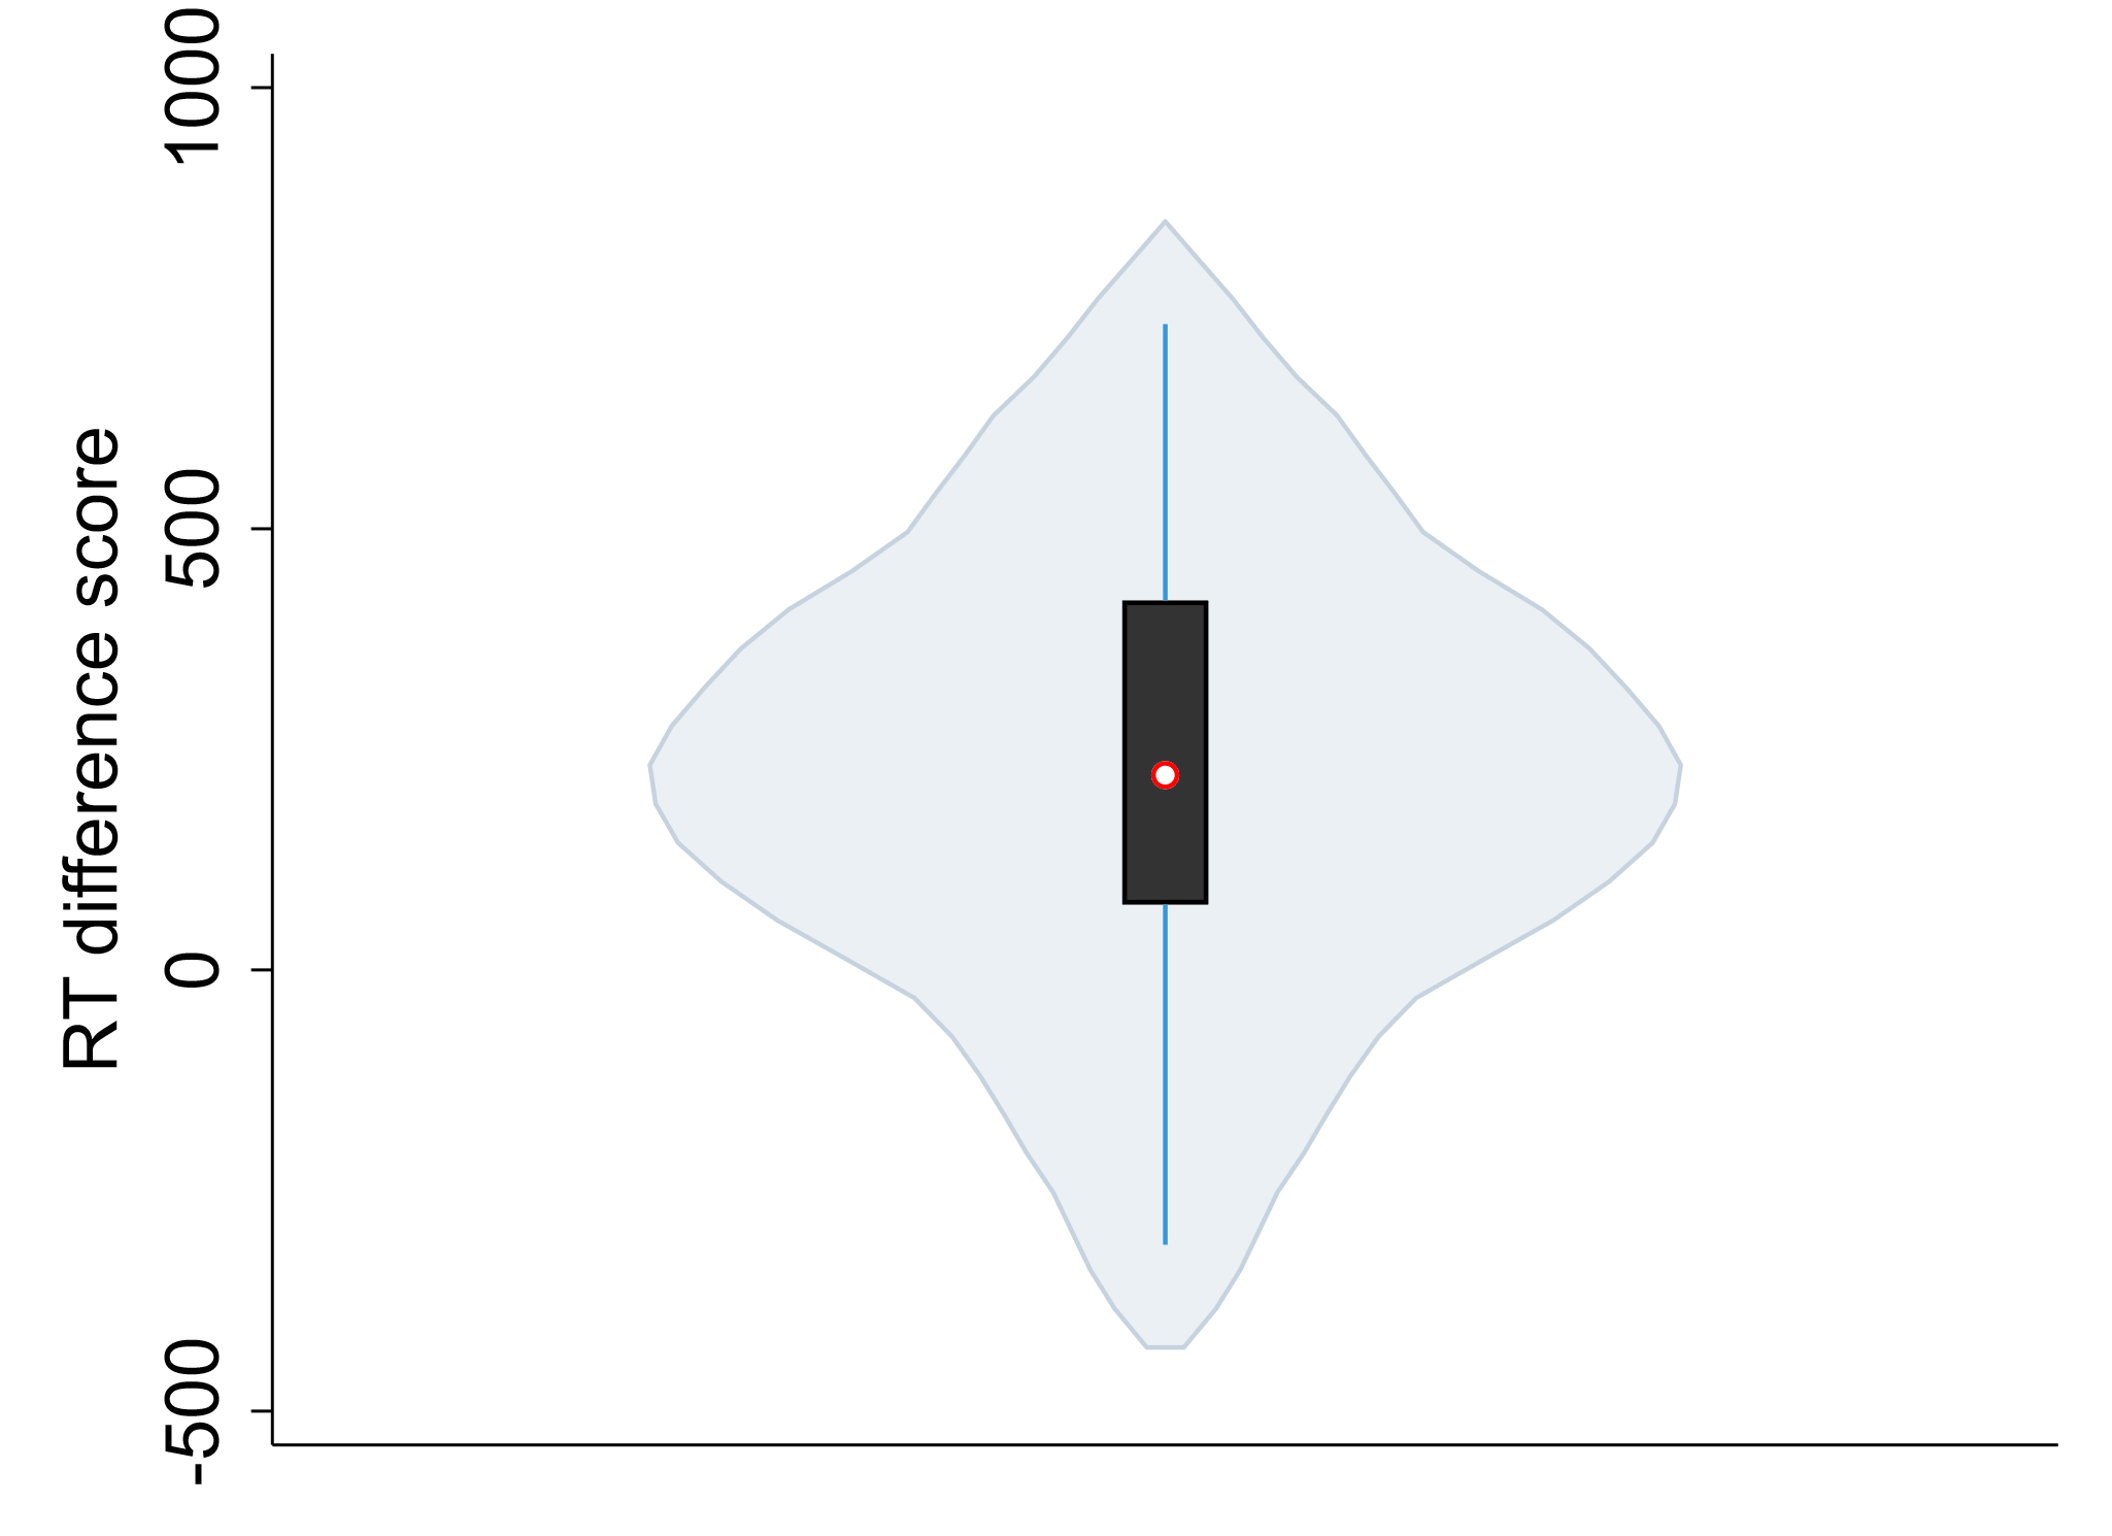

Supplement: MOESM1 [file 16146246]
