# Supplementary material for: Contrasting the Effects of Task Difficulty and Perceptual Load on Auditory Detection Sensitivity in Individuals with Autism
Source: Springer Nature journal article supplement (doi:10.1007/s10803-018-3766-8), 2018-09-22
Supplement: MOESM2 [file 16146246]

Supplementary Materials

Table S1 Means and standard deviations for reaction time and error rate according to diagnostic group and task condition

|  |  | **Reaction Time**  (in ms) | | |  | **Error Rate**  (in %) | | |
| --- | --- | --- | --- | --- | --- | --- | --- | --- |
| **Condition** | **Statistic** | **ASD** | **TD** | **Total** |  | **ASD** | **TD** | **Total** |
| **Low load** | *M* | 1048.1 | 885.3 | 961.3 |  | 5 | 9 | 7 |
| *SD* | (240.9) | (302.1) | (282.9) |  | (6) | (9) | (8) |
|  |  |  |  |  |  |  |  |  |
| **High load** | *M* | 1471.6 | 1316.6 | 1388.9 |  | 28 | 29 | 28 |
| *SD* | (256.7) | (336.5) | (307.1) |  | (10) | (17) | (14) |
|  |  |  |  |  |  |  |  |  |
| **Degraded low load** | *M* | 1282.2 | 1073 | 1170.6 |  | 14 | 15 | 14 |
| *SD* | (351.5) | (301.3) | (337.1) |  | (15) | (11) | (13) |

Note: ASD = Autism Spectrum Disorder, TD = Typically Developing, ms = milliseconds

Table S2 Detection rate, false alarm rate, detection sensitivity (*d’*) and response criterion (c) according to diagnostic group and task condition

|  |  | **Detection rate**  (in %) | | |  | **False alarm rate**  (in %) | | | |  | | **Detection sensitivity** (d’) | | | |  | | **Response criterion** (c) | | | |
| --- | --- | --- | --- | --- | --- | --- | --- | --- | --- | --- | --- | --- | --- | --- | --- | --- | --- | --- | --- | --- | --- |
| **Condition** | **Statistic** | **ASD** | **TD** | **Total** |  | **ASD** | **TD** | **Total** |  | | **ASD** | | **TD** | **Total** |  | | **ASD** | | **TD** | **Total** |
| **Low load** | *M* | 89.4 | 87.8 | 88.6 |  | 10.6 | 11.4 | 11.1 |  | | 2.79 | | 2.67 | 2.73 |  | | 1.47 | | 1.43 | 1.45 |
| *SD* | (10) | (10.3) | (10) |  | (11.3) | (10.5) | (10.7) |  | | (0.68) | | (0.85) | (.76) |  | | (1.17) | | (1.34) | (1.24) |
|  |  |  |  |  |  |  |  |  |  | |  | |  |  |  | |  | |  |  |
| **High load** | *M* | 80.2 | 72.8 | 76.3 |  | 23.9 | 16.2 | 19.8 |  | | 1.9 | | 1.89 | 1.89 |  | | 1.24 | | 1.59 | 1.43 |
| *SD* | (13.7) | (24.1) | (20) |  | (18) | (14.4) | (16.3) |  | | (1.24) | | (1.1) | (1.14) |  | | (1) | | (1.16) | (1.08) |
|  |  |  |  |  |  |  |  |  |  | |  | |  |  |  | |  | |  |  |
| **Degraded low load** | *M* | 82.6 | 84.4 | 83.6 |  | 13.6 | 12.1 | 12.8 |  | | 2.61 | | 2.53 | 2.57 |  | | 2.25 | | 2.27 | 2.26 |
| *SD* | (20.7) | (11.9) | (16.3) |  | (18.4) | (12.3) | (15.2) |  | | (1.31) | | (0.79) | (1.05) |  | | (1.65) | | (2.34) | (2.01) |

Note: ASD = Autism Spectrum Disorder, TD = Typically Developing
